# Supplementary material
Source: MDPI journal article supplement (https://www.mdpi.com/2227-9040/12/3/46)
Supplement: s1 [file s1]

## Supplementary Materials

**Table S1.** Results of accuracy, precision and recall obtained from the artificial neural network using scaled conjugate gradient (SCG), gradient descent momentum and an adaptive learning rate (GDX) and gradient descent with adaptive learning rate (GDA) learning algorithms for the dataset with 80% training and 20% testing samples.

| Experiment         | SCG | GDX | GDA |
|--------------------|-----|-----|-----|
| 1                  | 100 | 100 | 100 |
| 2                  | 100 | 100 | 100 |
| 3                  | 100 | 100 | 100 |
| 4                  | 100 | 100 | 100 |
| 5                  | 100 | 100 | 100 |
| 6                  | 100 | 100 | 100 |
| 7                  | 100 | 100 | 100 |
| 8                  | 100 | 100 | 100 |
| 9                  | 100 | 100 | 100 |
| 10                 | 100 | 100 | 100 |
| Best               | 100 | 100 | 100 |
| Average            | 100 | 100 | 100 |
| Standard Deviation | 0   | 0   | 0   |

**Table S2.** Results of accuracy obtained from the ANN using SCG, GDX and GDA algorithms for the dataset with 50% training and 50% testing samples.

| Experiment         | SCG | GDX   | GDA   |
|--------------------|-----|-------|-------|
| 1                  | 100 | 100   | 99.38 |
| 2                  | 100 | 100   | 99.08 |
| 3                  | 100 | 99.69 | 98.77 |
| 4                  | 100 | 99.69 | 98.77 |
| 5                  | 100 | 99.69 | 98.46 |
| 6                  | 100 | 99.38 | 98.46 |
| 7                  | 100 | 99.38 | 98.46 |
| 8                  | 100 | 99.38 | 98.15 |
| 9                  | 100 | 99.08 | 98.15 |
| 10                 | 100 | 99.08 | 97.85 |
| Best               | 100 | 100   | 99.38 |
| Average            | 100 | 99.39 | 98.46 |
| Standard Deviation | 0   | 0.223 | 0.353 |

**Table S3.** Results of accuracy obtained from the ANN using SCG, GDX and GDA algorithms for the dataset with 20% training and 80% testing samples.

| Experiment | SCG   | GDX   | GDA   |
|------------|-------|-------|-------|
| 1          | 99.81 | 88.27 | 81.15 |
| 2          | 98.08 | 86.35 | 78.65 |
| 3          | 97.5  | 84.81 | 77.88 |
| 4          | 97.31 | 84.04 | 77.31 |
| 5          | 96.35 | 83.85 | 76.92 |
| 6          | 95.96 | 83.27 | 76.92 |
| 7          | 95.77 | 82.88 | 76.54 |
| 8          | 95.58 | 82.12 | 76.35 |
| 9          | 95.19 | 81.92 | 75.96 |
| 10         | 95    | 81.54 | 75.58 |

|                    |       |       |       |
|--------------------|-------|-------|-------|
| Best               | 99.81 | 88.27 | 81.15 |
| Average            | 96.38 | 83.52 | 76.95 |
| Standard Deviation | 1.255 | 1.754 | 1.364 |

**Table S4.** Results of precision for the best accuracy obtained for each class from the ANN of the Tables 4, 5 and 6, using SCG, GDX and GDA learning algorithms for the datasets with 80% training and 20% testing samples (80/20), 50% training and 50% testing (50/50) and 20% training and 80% testing (20/80).

| Class   | 80/20 (%) |     |     | 50/50 (%) |     |       | 20/80 (%) |       |       |
|---------|-----------|-----|-----|-----------|-----|-------|-----------|-------|-------|
|         | SCG       | GDX | GDA | SCG       | GDX | GDA   | SCG       | GDX   | GDA   |
| 1       | 100       | 100 | 100 | 100       | 100 | 100   | 100       | 100   | 100   |
| 2       | 100       | 100 | 100 | 100       | 100 | 100   | 100       | 100   | 100   |
| 3       | 100       | 100 | 100 | 100       | 100 | 96.15 | 100       | 87.50 | 97.50 |
| 4       | 100       | 100 | 100 | 100       | 100 | 100   | 100       | 62.50 | 90    |
| 5       | 100       | 100 | 100 | 100       | 100 | 96.15 | 100       | 97.50 | 100   |
| 6       | 100       | 100 | 100 | 100       | 100 | 100   | 100       | 77.50 | 90    |
| 7       | 100       | 100 | 100 | 100       | 100 | 100   | 100       | 95    | 97.50 |
| 8       | 100       | 100 | 100 | 100       | 100 | 100   | 100       | 77.50 | 55    |
| 9       | 100       | 100 | 100 | 100       | 100 | 100   | 100       | 95    | 95    |
| 10      | 100       | 100 | 100 | 100       | 100 | 100   | 97.50     | 90    | 17.50 |
| 11      | 100       | 100 | 100 | 100       | 100 | 100   | 100       | 82.50 | 62.50 |
| 12      | 100       | 100 | 100 | 100       | 100 | 100   | 100       | 100   | 100   |
| 13      | 100       | 100 | 100 | 100       | 100 | 100   | 100       | 82.50 | 50    |
| Average | 100       | 100 | 100 | 100       | 100 | 99.4  | 99.81     | 88.27 | 81.15 |

**Table S5.** Results of recall for the best accuracy obtained for each sample class from the ANN of the Tables S1, S2 and S3, using SCG, GDX and GDA learning algorithms for the datasets with 80% training and 20% testing samples (80/20), 50% training and 50% testing (50/50) and 20% training and 80% testing (20/80).

| Class   | 80/20 (%) |     |     | 50/50 (%) |     |      | 20/80 (%) |      |       |
|---------|-----------|-----|-----|-----------|-----|------|-----------|------|-------|
|         | SCG       | GDX | GDA | SCG       | GDX | GDA  | SCG       | GDX  | GDA   |
| 1       | 100       | 100 | 100 | 100       | 100 | 100  | 100       | 100  | 100   |
| 2       | 100       | 100 | 100 | 100       | 100 | 100  | 100       | 100  | 100   |
| 3       | 100       | 100 | 100 | 100       | 100 | 96.1 | 100       | 87.5 | 97.5  |
| 4       | 100       | 100 | 100 | 100       | 100 | 100  | 100       | 62.5 | 90    |
| 5       | 100       | 100 | 100 | 100       | 100 | 96.1 | 100       | 97.5 | 100   |
| 6       | 100       | 100 | 100 | 100       | 100 | 100  | 100       | 77.5 | 90    |
| 7       | 100       | 100 | 100 | 100       | 100 | 100  | 100       | 95   | 97.5  |
| 8       | 100       | 100 | 100 | 100       | 100 | 100  | 100       | 77.5 | 55    |
| 9       | 100       | 100 | 100 | 100       | 100 | 100  | 100       | 95   | 95    |
| 10      | 100       | 100 | 100 | 100       | 100 | 100  | 97.5      | 90   | 17.5  |
| 11      | 100       | 100 | 100 | 100       | 100 | 100  | 100       | 82.5 | 62.5  |
| 12      | 100       | 100 | 100 | 100       | 100 | 100  | 100       | 100  | 100   |
| 13      | 100       | 100 | 100 | 100       | 100 | 100  | 100       | 82.5 | 50    |
| Average | 100       | 100 | 100 | 100       | 100 | 99.4 | 99.81     | 88.2 | 81.15 |

**Table S6.** Results of accuracy for the 10-fold cross validation obtained from the ANN using SCG for the three datasets.

| Experiment         | 80/20 (%) | 50/50 (%) | 20/80 (%) |
|--------------------|-----------|-----------|-----------|
| 1                  | 99.85     | 99.45     | 96.13     |
| 2                  | 99.85     | 99.32     | 95.85     |
| 3                  | 99.77     | 84.81     | 95.63     |
| 4                  | 99.77     | 99.26     | 95.5      |
| 5                  | 99.77     | 99.23     | 95.44     |
| 6                  | 99.77     | 99.23     | 95.37     |
| 7                  | 99.69     | 99.20     | 95.35     |
| 8                  | 99.69     | 99.17     | 95.35     |
| 9                  | 99.69     | 99.14     | 95.33     |
| 10                 | 99.69     | 99.11     | 95.29     |
| Best               | 99.85     | 99.45     | 96.13     |
| Average            | 99.76     | 99.18     | 95.44     |
| Standard Deviation | 0.0553    | 0.0653    | 0.1748    |
